# Supplementary material
Source: ML conference proceedings conference paper supplement (https://openreview.net/forum?id=qmJCo8dMBD)
Supplement: supplementary_material [file attachment]

# Supplementary Materials: Aspects are Anchors: Towards Multimodal Aspect-based Sentiment Analysis via Aspect-driven Alignment and Refinement

Anonymous Authors

## 1 GENERALIZATION CAPABILITY ON MULTIMODAL SENTIMENT ANALYSIS

To verify the generalization capability of our ADAR on other tasks, we conduct experiments on two datasets, MOSI [10] and MOSEI [11], for multimodal sentiment analysis. MOSI is a collection of YouTube monologues consisting of 2,199 movie samples, which are separated into 1,284 training samples, 229 validation samples, and 686 testing samples. MOSEI is an improvement over MOSI with a total of 23,453 video clips, spanning 1,000 distance speakers. To comprehensively validate the performance of our ADAR, we make a comparison with several advanced methods, including LMF [4], MFM [6], MuT [5], MISA [3], Self-MM [9], MMIM [2], FDMER [8], and DBF [7]. In order to fit our method for the task, we employ the pre-trained WavLM [1] to extract the audio features and conduct optimal transport similar to the text and visual features.

As shown in Table 1, we find that our model still maintains a competitive performance over all comparative baselines. It is worth noting that our model obtains the second best results on the metrics of *Acc-2* and *F1* on both datasets, demonstrating its excellent generalization ability. This performance gain is largely due to our alignment and refinement method, which aligns disparate modalities using aspect-driven optimal transport and augments their synergy through a dual-layer refinement process. Moreover, ADAR also shows an effective fine-grained analysis ability for its superior performance on *Acc-7*. In summary, the study presents compelling evidence of ADAR’s consistent ability to enhance performance in Multimodal Sentiment Analysis.

## REFERENCES

- [1] Sanyuan Chen, Chengyi Wang, Zhengyang Chen, Yu Wu, Shujie Liu, Zhuo Chen, Jinyu Li, Naoyuki Kanda, Takuya Yoshioka, Xiong Xiao, et al. 2022. Wavlm: Large-scale self-supervised pre-training for full stack speech processing. *IEEE Journal of Selected Topics in Signal Processing* 16, 6 (2022), 1505–1518.
- [2] Wei Han, Hui Chen, and Soujanya Poria. 2021. Improving multimodal fusion with hierarchical mutual information maximization for multimodal sentiment analysis. *arXiv preprint arXiv:2109.00412* (2021).
- [3] Devamanyu Hazarika, Roger Zimmermann, and Soujanya Poria. 2020. Misa: Modality-invariant and-specific representations for multimodal sentiment analysis. In *Proceedings of the 28th ACM international conference on multimedia*. 1122–1131.
- [4] Zhun Liu, Ying Shen, Varun Bharadhwaj Lakshminarasimhan, Paul Pu Liang, Amir Zadeh, and Louis-Philippe Morency. 2018. Efficient low-rank multimodal fusion with modality-specific factors. *arXiv preprint arXiv:1806.00064* (2018).
- [5] Yao-Hung Hubert Tsai, Shaojie Bai, Paul Pu Liang, J Zico Kolter, Louis-Philippe Morency, and Ruslan Salakhutdinov. 2019. Multimodal transformer for unaligned multimodal language sequences. In *Proceedings of the conference. Association for computational linguistics. Meeting*, Vol. 2019. NIH Public Access, 6558.
- [6] Yao-Hung Hubert Tsai, Paul Pu Liang, Amir Zadeh, Louis-Philippe Morency, and Ruslan Salakhutdinov. 2018. Learning factorized multimodal representations. *arXiv preprint arXiv:1806.06176* (2018).
- [7] Shaoxing Wu, Damai Dai, Ziwei Qin, Tianyu Liu, Binghui Lin, Yunbo Cao, and Zhifang Sui. 2023. Denoising Bottleneck with Mutual Information Maximization for Video Multimodal Fusion. *arXiv preprint arXiv:2305.14652* (2023).
- [8] Dingkan Yang, Shuai Huang, Haopeng Kuang, Yangtao Du, and Lihua Zhang. 2022. Disentangled representation learning for multimodal emotion recognition.

In *Proceedings of the 30th ACM International Conference on Multimedia*. 1642–1651.

- [9] Wenmeng Yu, Hua Xu, Ziqi Yuan, and Jiele Wu. 2021. Learning modality-specific representations with self-supervised multi-task learning for multimodal sentiment analysis. In *Proceedings of the AAAI conference on artificial intelligence*, Vol. 35. 10790–10797.
- [10] Amir Zadeh, Rowan Zellers, Eli Pincus, and Louis-Philippe Morency. 2016. Multimodal sentiment intensity analysis in videos: Facial gestures and verbal messages. *IEEE Intelligent Systems* 31, 6 (2016), 82–88.
- [11] AmirAli Bagher Zadeh, Paul Pu Liang, Soujanya Poria, Erik Cambria, and Louis-Philippe Morency. 2018. Multimodal language analysis in the wild: Cmu-mosei dataset and interpretable dynamic fusion graph. In *Proceedings of the 56th Annual Meeting of the Association for Computational Linguistics (Volume 1: Long Papers)*. 2236–2246.

| Methods     | MOSI         |              |              |                     |                     | MOSEI        |              |              |                     |                     |
|-------------|--------------|--------------|--------------|---------------------|---------------------|--------------|--------------|--------------|---------------------|---------------------|
|             | MAE          | Corr         | Acc-7        | Acc-2               | F1                  | MAE          | Corr         | Acc-7        | Acc-2               | F1                  |
| LMF         | 0.917        | 0.695        | 33.20        | -/82.50             | -/82.40             | 0.623        | 0.677        | 48.00        | -/82.00             | -/82.10             |
| MFMM        | 0.877        | 0.706        | 35.40        | -/81.70             | -/81.60             | 0.568        | 0.717        | 51.30        | -/84.40             | -/84.30             |
| MuT         | 0.861        | 0.711        | 40.00        | 81.50/84.10         | 80.60/83.90         | 0.580        | 0.703        | 51.80        | -/82.50             | -/82.30             |
| MISA        | 0.804        | 0.764        | 42.30        | 80.79/82.10         | 80.77/82.03         | 0.568        | 0.724        | 52.20        | 82.59/84.23         | 82.67/83.97         |
| Self-MM     | 0.712        | 0.795        | 45.79        | 82.54/84.77         | 82.68/84.91         | 0.529        | 0.767        | 53.46        | 82.68/84.96         | 82.95/84.93         |
| MMIM        | <u>0.700</u> | <u>0.800</u> | <b>46.65</b> | 84.14/ <u>86.06</u> | 84.00/ <u>85.98</u> | <u>0.526</u> | <u>0.772</u> | <u>54.24</u> | 82.24/85.97         | 82.66/ <u>85.94</u> |
| FDMER       | 0.724        | 0.788        | 44.10        | -/84.60             | -/84.70             | 0.536        | <b>0.773</b> | 54.10        | -/ <u>86.19</u>     | -/85.80             |
| DBF         | <b>0.693</b> | <b>0.801</b> | 44.80        | <b>85.10/86.90</b>  | <b>85.10/86.90</b>  | <b>0.523</b> | <u>0.772</u> | <b>54.20</b> | <b>84.30/86.40</b>  | <b>84.80/86.20</b>  |
| ADAR (ours) | 0.703        | 0.790        | <u>46.04</u> | <u>84.22</u> /85.93 | <u>84.32</u> /85.44 | 0.533        | 0.771        | 54.11        | <u>83.33</u> /85.92 | <u>84.10</u> /85.56 |

Table 1: Performance on MOSI and MOSEI for multimodal sentiment analysis. The best results are in bold and the second best ones are underlined. Acc-2 denotes the accuracy over negative/non-negative, and F1 corresponds to negative/positive.
